# Supplementary material for: Transdermal Electrical Neuromodulation for Anxiety and Sleep Problems in High-Functioning Autism Spectrum Disorder: Feasibility and Preliminary Findings
Source: MDPI journal article supplement (doi:10.3390/jpm11121307), 2021-12-06
Supplement: s1 [file s1]

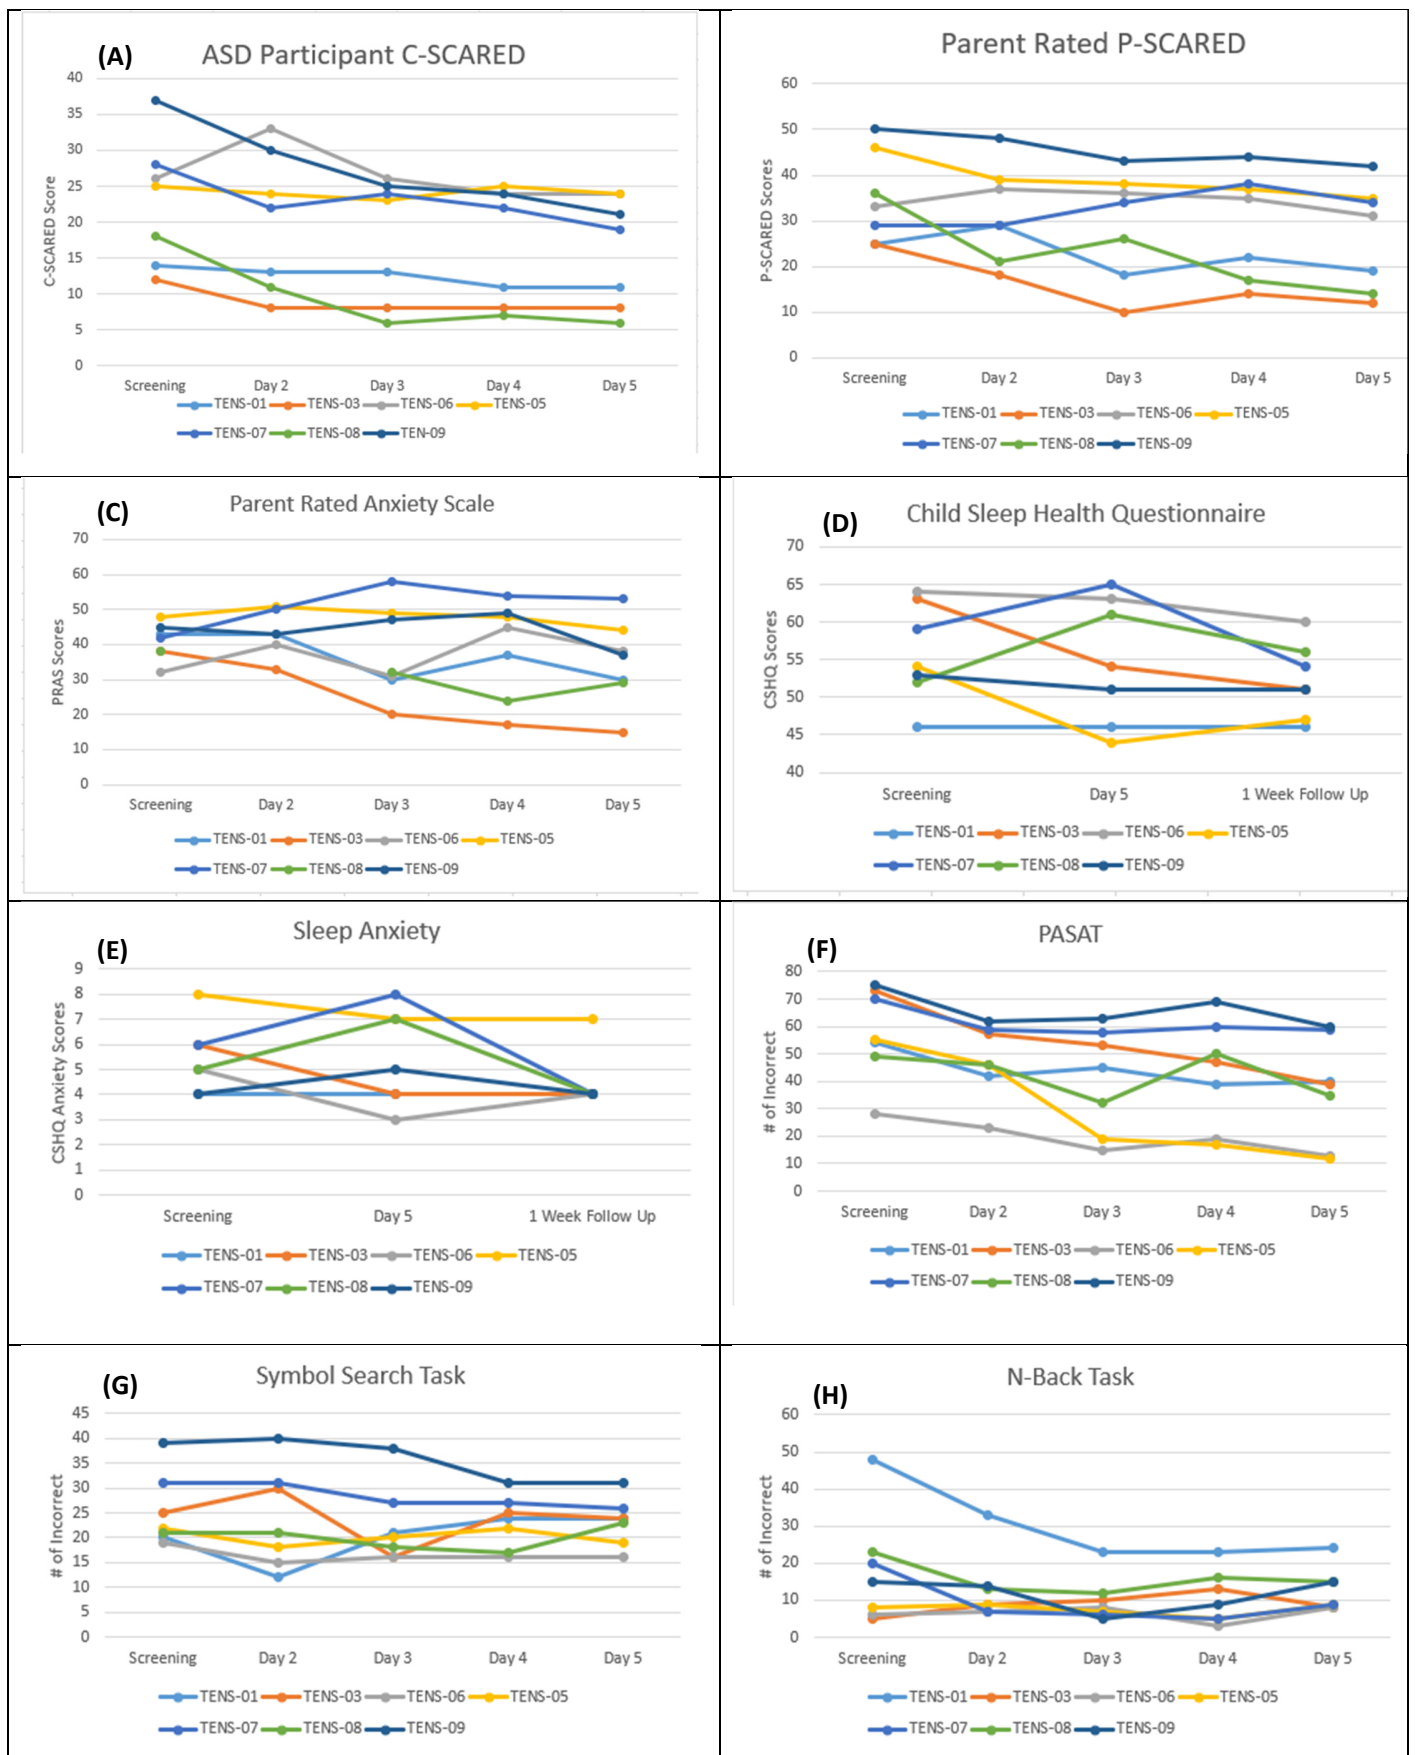

Figure S1: Individual distribution of scores of (A) C-SCARED, (B) P-SCARED, (C) PRAS, (D) CSHQ, (E) Sleep Anxiety, as well as number of incorrect scores on the (F) PASAT, (G) Symbol Search and (H) N-Back tasks.

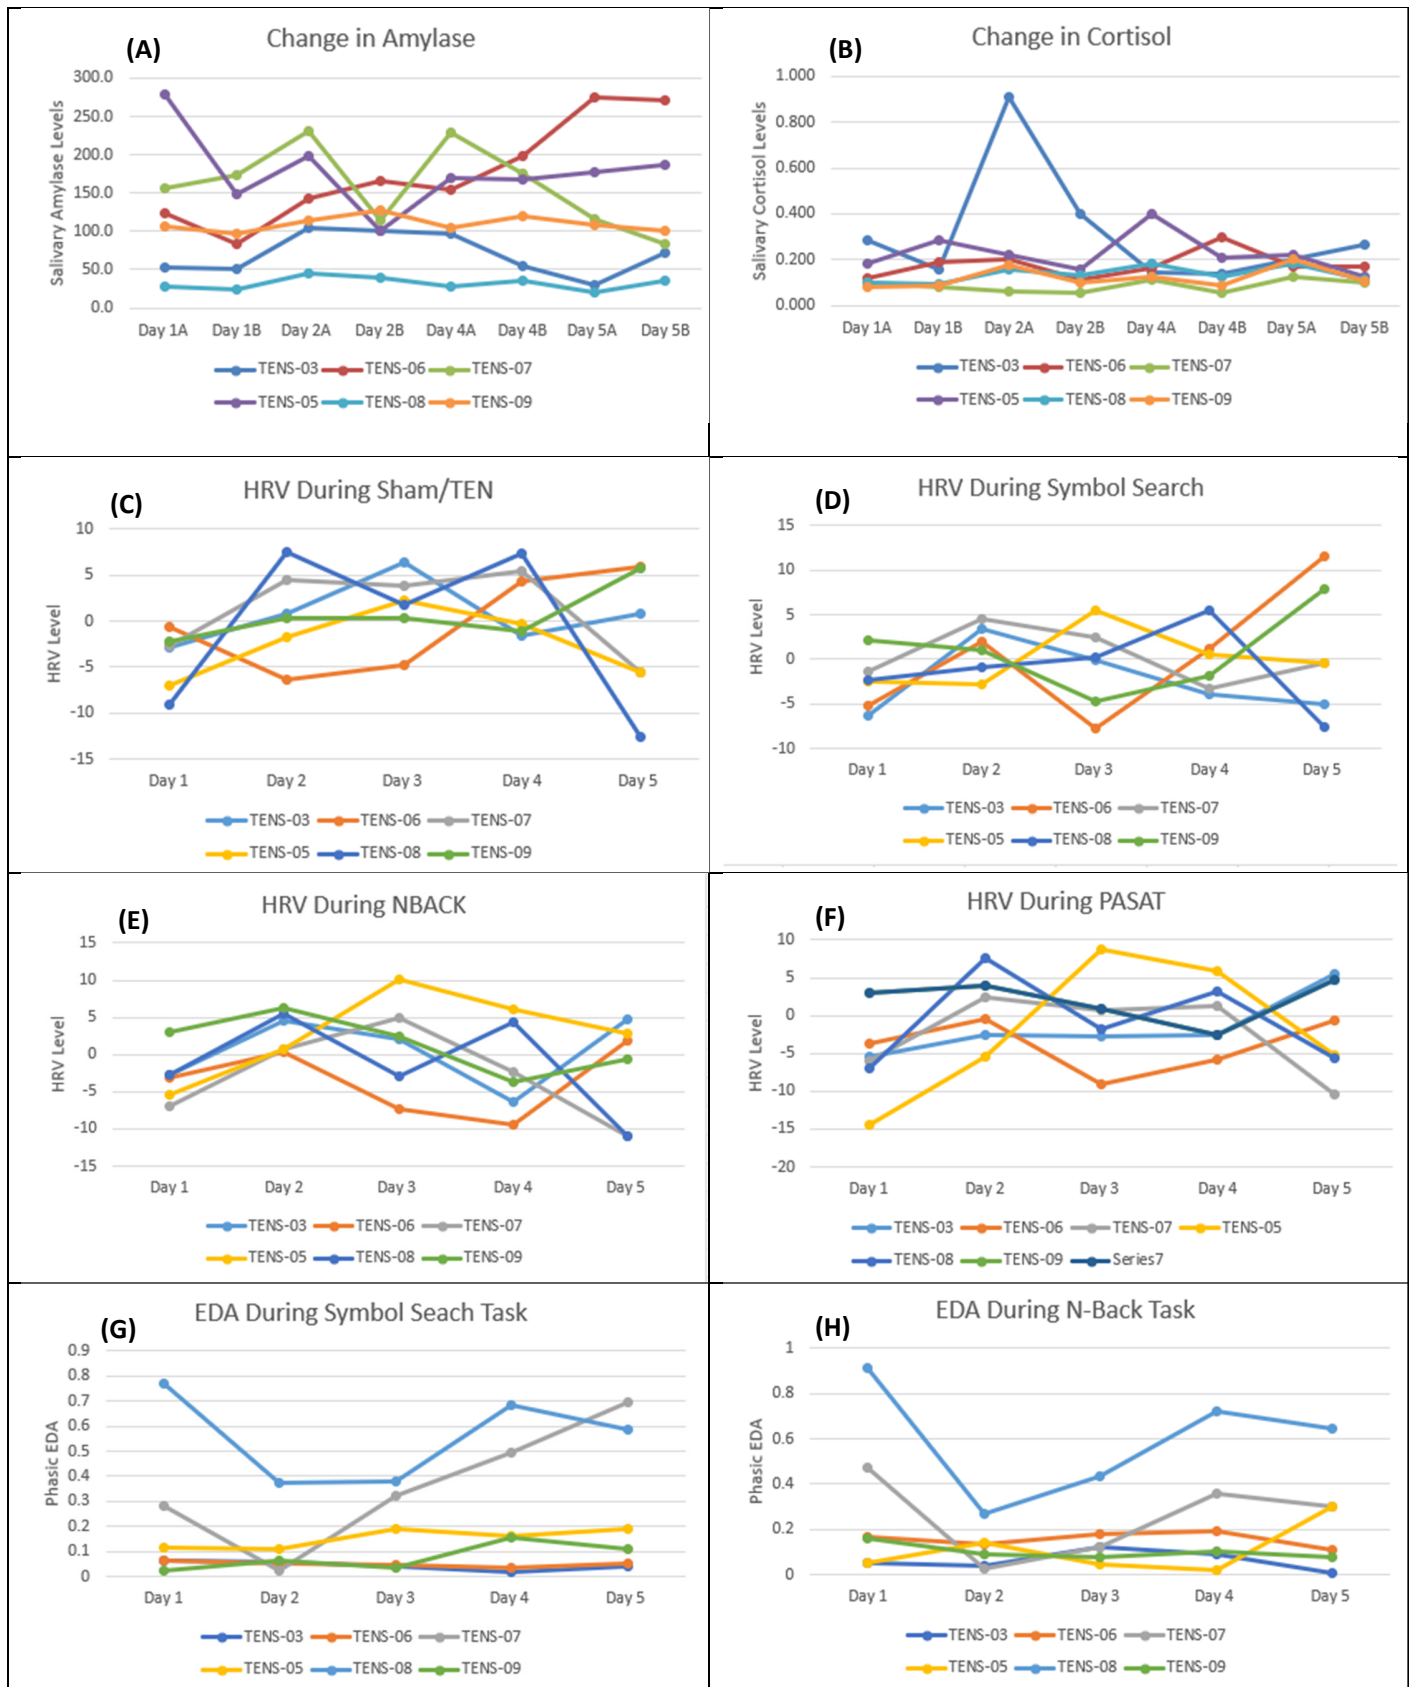

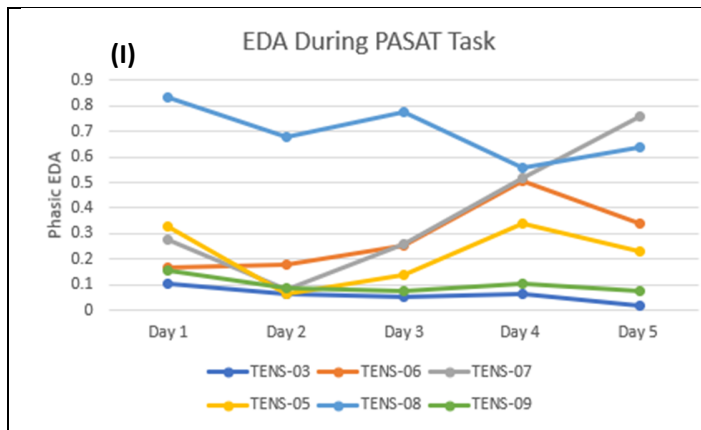

Figure S2: Individual progression of all autonomic measures including (A) Amylase, (B) Cortisol, (C) HRV during Sham/TEN Treatment, (D) HRV during Symbol Search task, (E) HRV during N-Back task, (F) HRV during PASAT task, (G) EDA during Symbol Search task, (H) EDA during N-Back task and (I) EDA during PASAT task.
